# Supplementary material for: Rapid and Recent World-Wide Diversification of Bluegrasses (Poa, Poaceae) and Related Genera
Source: PubMed Central journal article supplement (PMC3609727; doi:10.1371/journal.pone.0060061), 2013-03-27
Supplement: pone.0060061.s001.pdf [file pone.0060061.s001.pdf]

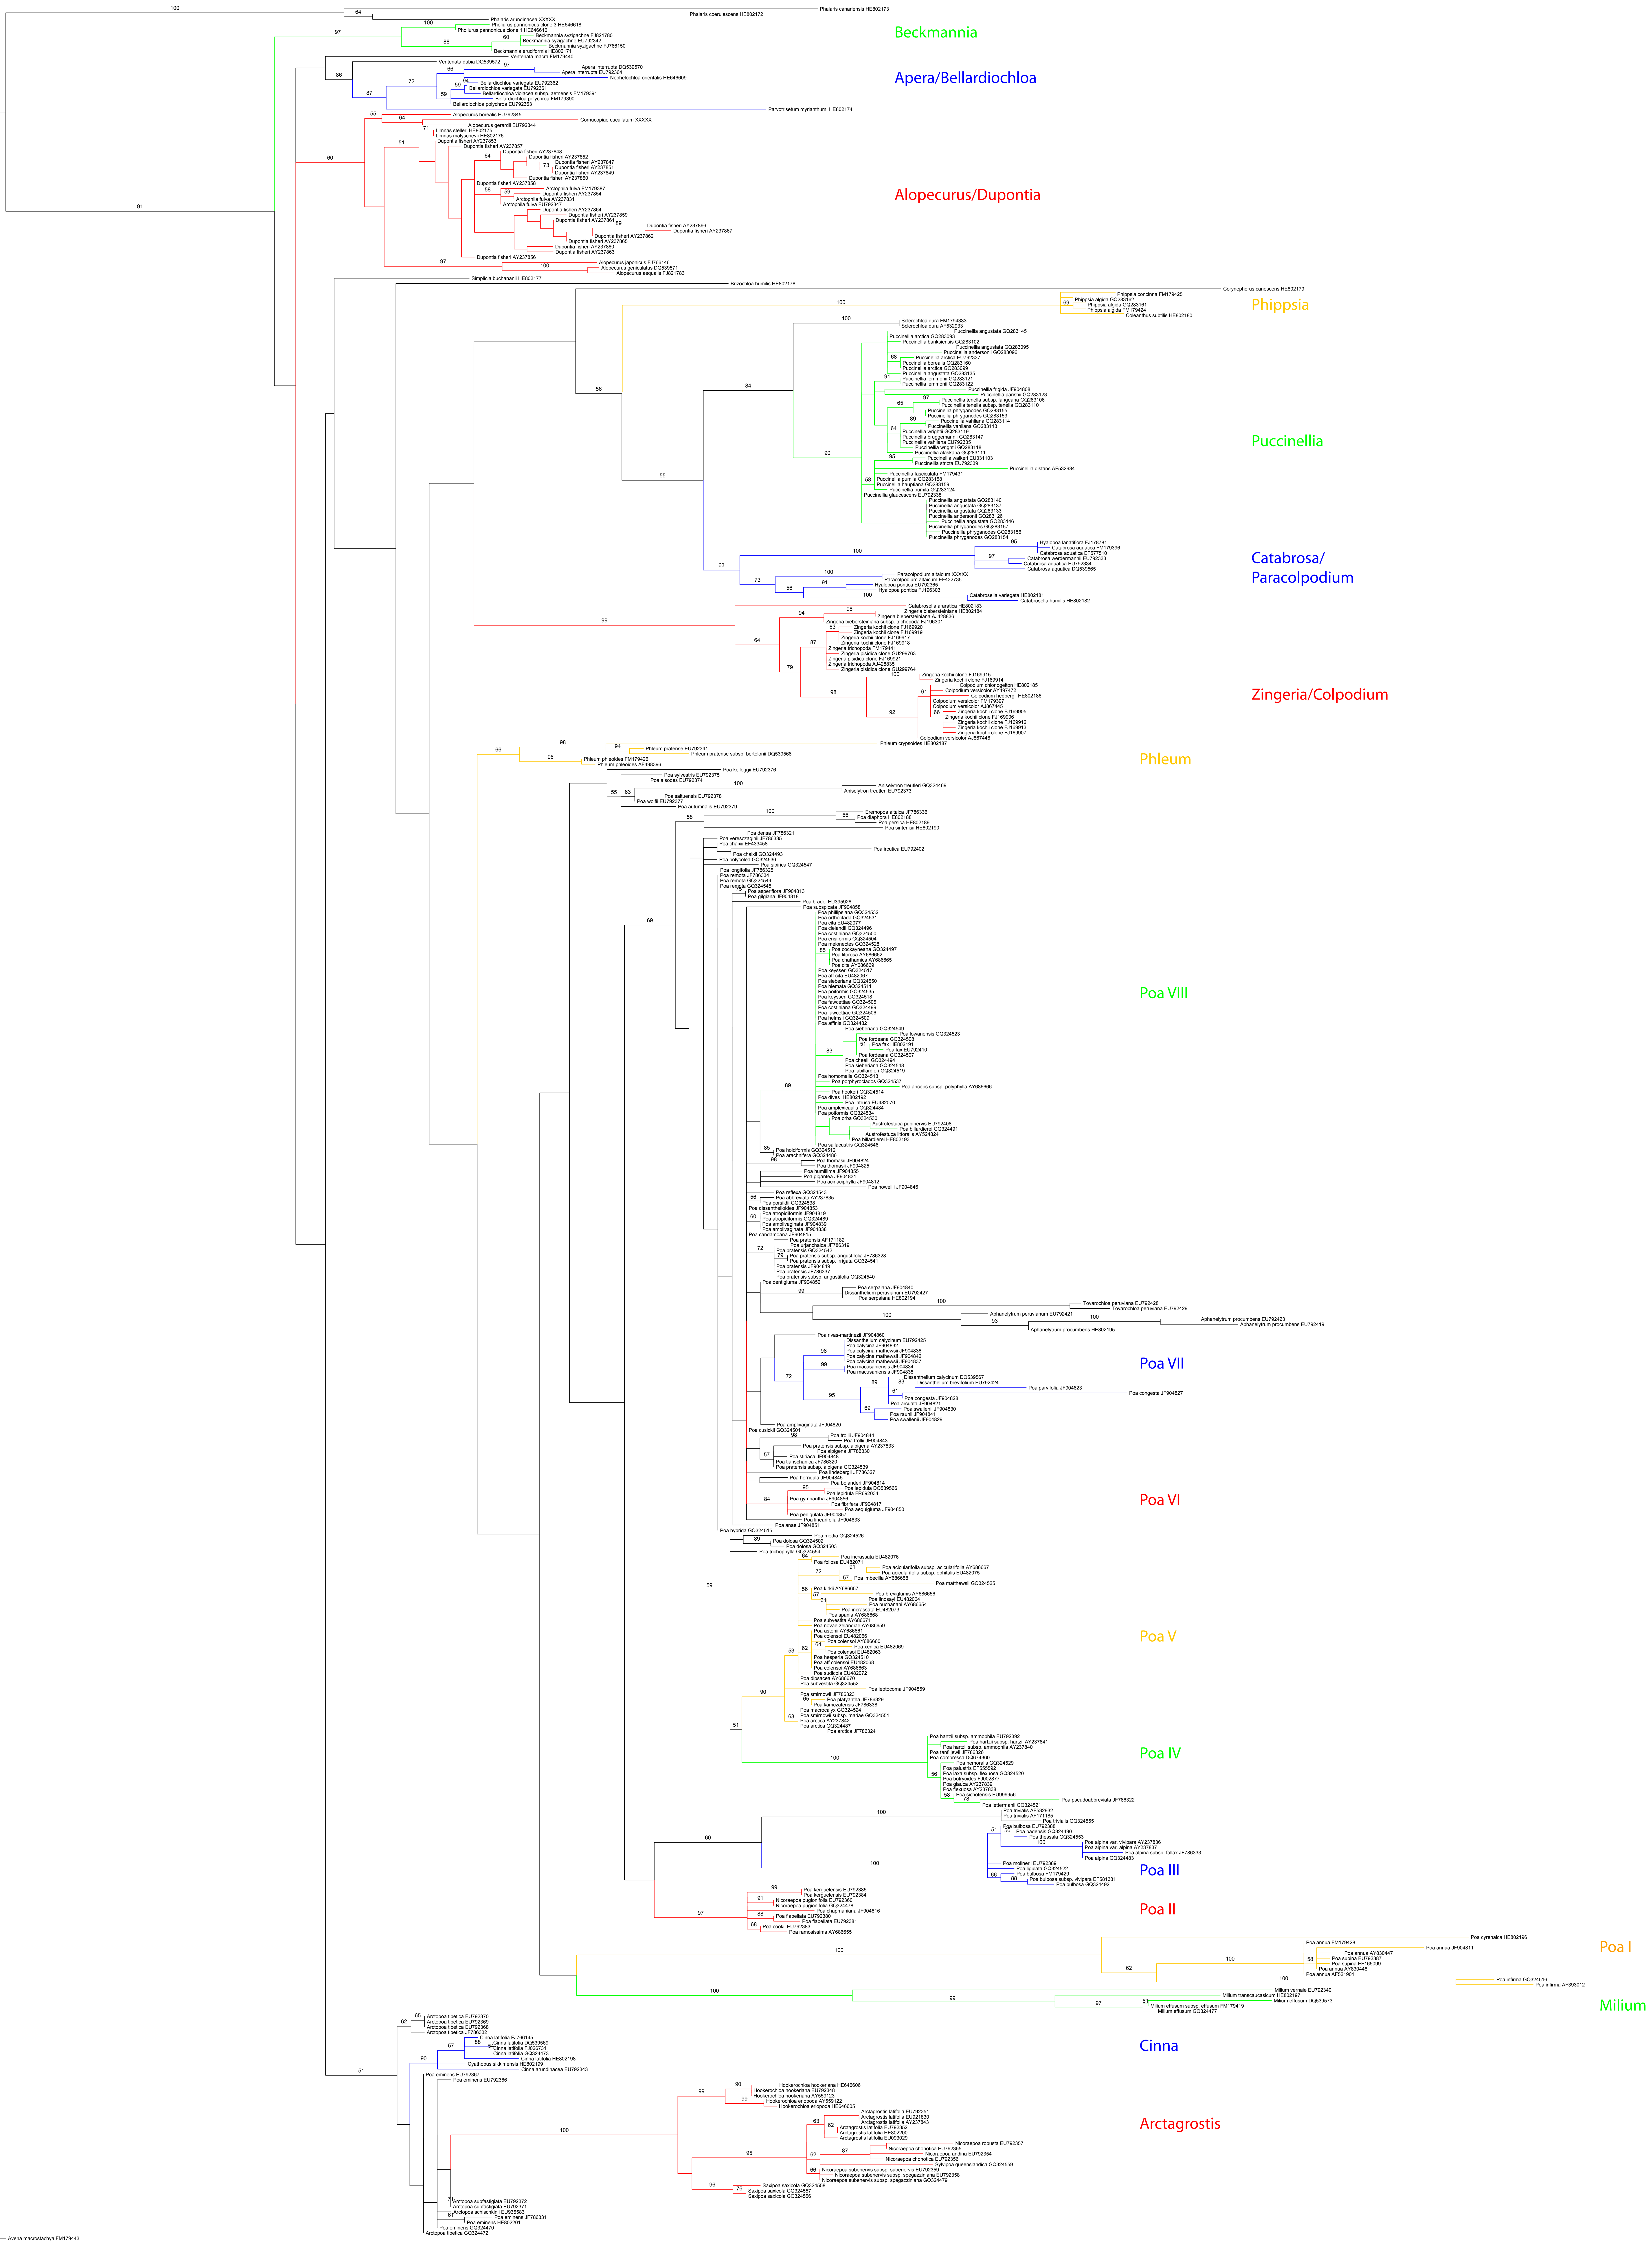

Beckmannia

Apera/Bellardiocloa

Alopecurus/Dupontia

Phippsia

Puccinellia

Catabrosa/  
Paracolpodium

Zingeria/Colpodium

Phleum

Poa VIII

Poa VII

Poa VI

Poa V

Poa IV

Poa III

Poa II

Poa I

Milium

Cinna

Arctagrostis
